# Supplementary material for: MiR-125b regulates endometrial receptivity by targeting MMP26 in women undergoing IVF-ET with elevated progesterone on HCG priming day
Source: PubMed Central journal article supplement (PMC4855158; doi:10.1038/srep25302), 2016-05-04
Supplement: srep25302-s1.pdf [file srep25302-s1.pdf]

**MiR-125b regulates endometrial receptivity by targeting MMP26 in women undergoing  
IVF-ET with elevated progesterone on HCG priming day**

Cheng Chen<sup>1,2</sup>, Yue Zhao<sup>1,2,3</sup>, Yang Yu<sup>1,2,3,\*</sup>, Rong Li<sup>1,2,3,\*</sup>, Jie Qiao<sup>1,2</sup>

1 Reproductive Medical Centre, Department of Obstetrics and Gynecology, Peking University  
Third Hospital, Beijing, 100191, China

2 Key Laboratory of Assisted Reproduction, Ministry of Education, Beijing, 100191, China

3 Beijing Key Laboratory of Reproductive Endocrinology and Assisted Reproductive  
Technology, Beijing, 100191, China

\* Corresponding author:

Supplementary table 1 Primer sequences for real time PCR.

| Gene           | Sequence 5'-3'             |
|----------------|----------------------------|
| Cytokeratin    | F: CTGACCGACGAGATCAACTTC   |
|                | R: TGGCGTTGGCATCCTTAAT     |
| Vimentin       | F: GATTCACTCCCTCTGGTTGATAC |
|                | R: CTTGTAGGAGTGTCGGTTGTT   |
| GADPH          | F: GGCATTGTGGAAGGGCTCA     |
|                | R: GTGGATGCAGGGATGATGTTCT  |
| MMP26          | F: GGGACTTTGTTGAGGGCTATT   |
|                | R: GTCAAGTAGGTCTGTCCCATTC  |
| $\beta$ -actin | F: TGCCCATCTACGAGGGGTAT    |
|                | R: CTTAATGTCACGCACGATTCC   |
